# Supplementary material for: Sustainable Elimination of Schistosomiasis in Ethiopia—A Five-Year Follow-Up Study
Source: MDPI journal article supplement (doi:10.3390/tropicalmed7090218), 2022-09-01
Supplement: s1 [file s1]

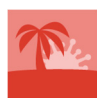

# Supplementary Materials: Sustainable Elimination of Schistosomiasis in Ethiopia—A Five-Year Follow-Up Study

**Table S1.** Participating primary schools in Mekele, Ethiopia.

| Name of School | Location   | Students Enrolled in Schools in 2018 | Participating Students in 2018 |
|----------------|------------|--------------------------------------|--------------------------------|
| Gereb Tsedo    | urban      | 1436                                 | 56                             |
| Quiha          | urban      | 1406                                 | 54                             |
| Ethio-China    | urban      | 1253                                 | 48                             |
| Adi Haki       | urban      | 1166                                 | 45                             |
| Ayder          | urban      | 1660                                 | 64                             |
| Gembela        | urban      | 550                                  | 21                             |
| Atse Yohannes  | urban      | 2445                                 | 94                             |
| Aynalem        | semi-urban | 1044                                 | 40                             |
| Feleg Daero    | semi-urban | 774                                  | 34                             |
| Lachi          | semi-urban | 2863                                 | 108                            |
| Debri          | semi-urban | 1491                                 | 60                             |
| Total          |            | 16,088                               | 624                            |

**Table S2.** Prevalence of infection by school location and distance from river.

|                    | Urban schools     |             |         |                   |                  |                 |       | Semi-urban schools |                |           |             |                               |                             |
|--------------------|-------------------|-------------|---------|-------------------|------------------|-----------------|-------|--------------------|----------------|-----------|-------------|-------------------------------|-----------------------------|
|                    | ≤ 500m from river |             |         | > 500m from river |                  |                 |       | ≤ 500m from river  |                |           | > 500m      |                               |                             |
|                    | Gereb<br>Tsedo    | Adi<br>Haki | Ayder   | Gembela           | Atse<br>Yohannes | Ethio-<br>China | Quiha | Debri              | Feleg<br>Daero | Lachi     | Aynale<br>m | n<br>children<br>in<br>survey | n<br>S.manson<br>i positive |
| S.manson<br>i 2010 | 0(0%)             | 1(3.3%)     | ND      | 5(15.6%)          | 1(3.3%)          | 5(8.9%)         | 0(0%) | ND                 | 19(44.2%)      | 6(5.5%)   | 1(%)        | 599                           | 53(8.9%)                    |
| S.manson<br>i 2018 | 2(3.8%)           | 0(0%)       | 6(9.4%) | 13(62%)           | 0(0%)            | 1(2.1%)         | 0(0%) | 16(26.7%)          | 24(70.6%)      | 16(14.8%) | 0(0%)       | 624                           | 76(12.2%)                   |

ND = No Data available.

**Table S3.** KAP results (knowledge, attitude and practice) by PHS schools and responder schools.

|                        | Mean ± SD    | Mean ± SD    | Mean ± SD    |         |
|------------------------|--------------|--------------|--------------|---------|
| Knowledge (0–7 score)  | 4.00 ± 1.38  | 3.89 ± 1.37  | 3.96 ± 1.38  | 0.403   |
| Attitudes (0–7 score)  | 4.65 ± 1.55  | 4.42 ± 1.42  | 4.57 ± 1.51  | 0.030   |
| Practice (0–6 score)   | 4.19 ± 0.88  | 3.91 ± 0.99  | 4.09 ± 0.93  | < 0.001 |
| Total KAP score (0–20) | 12.77 ± 2.75 | 12.21 ± 2.63 | 12.57 ± 2.72 | 0.003   |

**Table S4.** Median KAP results (knowledge, attitude and practice) by school.

| School                 | Gereb Tsedo | Quiha  | Ethio-China | Adi Haki | Feleg Daero | Gembela | Atse Yohann | Aynalem | Ayder  | Lachi   | Debri  | Total   | p-Value |
|------------------------|-------------|--------|-------------|----------|-------------|---------|-------------|---------|--------|---------|--------|---------|---------|
|                        | n = 56      | n = 54 | n = 48      | n = 45   | n = 34      | n = 21  | n = 94      | n = 40  | n = 64 | n = 108 | n = 60 | n = 624 |         |
| Knowledge (0–7 score)  | 4           | 5      | 3           | 4        | 4           | 3       | 4           | 4       | 4      | 4       | 4      | 4       | < 0.001 |
| Attitudes (0–7 score)  | 5           | 5      | 5           | 5        | 4.5         | 5       | 5           | 4.5     | 4      | 5       | 4      | 5       | < 0.001 |
| Practice (0–6 score)   | 5           | 5      | 4.5         | 4        | 4           | 4       | 4           | 4       | 4      | 4       | 4      | 4       | < 0.001 |
| Total KAP score (0–20) | 14          | 14     | 13          | 14       | 12.5        | 12      | 13          | 12.5    | 12.5   | 13      | 11     | 13      | < 0.001 |

**Table S5.** Study population demographics and infection prevalence, by school.

|                   | Gereb<br>Tsedo | Quiha         | Ethio-<br>China | Adi<br>Haki   | Feleg<br>Daero | Gembel<br>a   | Atse<br>Yohann | Aynalem    | Ayder         | Lachi         | Debri         | Total          | p-Value |
|-------------------|----------------|---------------|-----------------|---------------|----------------|---------------|----------------|------------|---------------|---------------|---------------|----------------|---------|
|                   | n = 56         | n = 54        | n = 48          | n = 45        | n = 34         | n = 21        | n = 94         | n = 40     | n = 64        | n = 108       | n = 60        | n = 624        |         |
| Sex<br>(n, %)     |                |               |                 |               |                |               |                |            |               |               |               |                |         |
| Boys              | 29<br>(51.8%)  | 29<br>(53.7%) | 25<br>(52.1%)   | 23<br>(51.1%) | 18<br>(52.9%)  | 10<br>(47.6%) | 46<br>(48.9%)  | 20 (50%)   | 31<br>(48.4%) | 53<br>(49.1%) | 31<br>(51.7%) | 315<br>(50.5%) | 0.99    |
| Girls             | 27<br>(48.2%)  | 25<br>(46.3%) | 23<br>(47.9%)   | 22<br>(48.9%) | 16<br>(47.1%)  | 11<br>(52.4%) | 48<br>(51.1%)  | 20 (50%)   | 33<br>(51.6%) | 55<br>(50.9%) | 29<br>(48.3%) | 309<br>(49.5%) |         |
| Grade<br>(median) | 3.5            | 4.5           | 3.5             | 3             | 3              | 3             | 4              | 4          | 3             | 4.5           | 4             | 4              | < 0.001 |
| Age,<br>years     | 9.9 ± 2.3      | 10.4 ± 2.2    | 9.5 ± 1.8       | 9.4 ± 1.9     | 10.1 ± 2.2     | 9.5 ± 1.4     | 10.3 ± 2.5     | 10.9 ± 2.1 | 9.5 ± 1.7     | 10.6 ± 2.3    | 11.2 ± 2.7    | 10.2 ± 2.3     | < 0.001 |

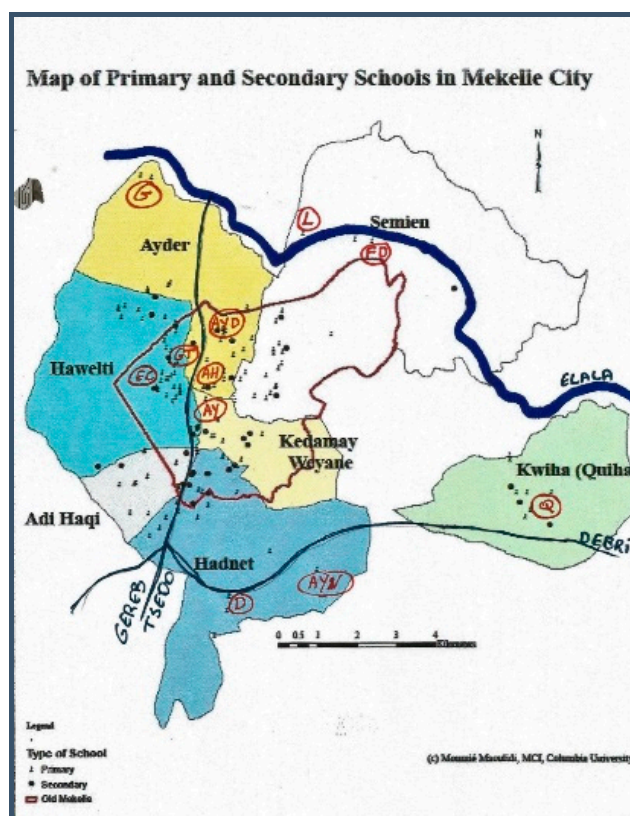

**Figure S1.** Map of Mekele City, the seven sub-divisions, main rivers, and the schools included in the study. G = Gembela school; L = Lachi school; FD = Feleg Daero school; Q = Quiha school; AYD = Ayder school; GT = Gereb Tsedo school; EC = Ethio-China school; AH = Adi Haki school; AY = Atse Yohannes school; AYN = Aynalem school; D = Debri school.

## Appendix S1. Knowledge Attitude Practice (KAP) survey developed by NALA 2019

KAP (Knowledge Attitude Practice) survey

Date .....

Name of School..... number.....

Age .....

Sex .....

Grade .....

Address .....

Part A- Knowledge. Mark one answer.

**1. Have you heard of intestinal worm infections?**

- a. Yes
- b. No

**2. Can a person get infected with intestinal worms by walking barefoot?**

- a. Yes
- b. No

**3. Can a person be infected with intestinal worms from a mosquito bite?**

- a. Yes
- b. No

**4. Which of the following is a symptom of intestinal worms?**

- a. Red, itchy eyes
- b. Diarrhea
- c. Fever

**5. How does trachoma (eye infection) spread from a sick person to a healthy person?**

- a. Sharing face cloths
- b. Swimming in water
- c. Reading at night

**6. To prevent infection when eating vegetables, a person needs to....**

- a. Do nothing
- b. Wash, cook, or peel the vegetables
- c. Put them in the sun

**7. Can open defecation cause disease?**

- a. No

b. Yes

## B. Attitudes

**8. When medication for disease is given in school, I feel comfortable taking the medication.**

- a. Agree
- b. Disagree

**9. Wearing shoes is important for my health.**

- a. Agree
- b. Disagree

**10. Intestinal parasites is a big health problem in my school.**

- a. Agree
- b. Disagree

**11. It is okay if children defecate in the water or the field.**

- a. Agree
- b. Disagree

**12. It is better to use a latrine.**

- a. Agree
- b. Disagree

**13. I feel embarrassed if my friends see me open defecate.**

- a. Agree
- b. Disagree

## C. Practice.

Mark one answer

**14. I swim/play/wash myself in the river...**

- a. Never
- b. Sometimes
- c. Everyday

**15. If a latrine is available, I use it....**

- a. Never
- b. Sometimes
- c. All the time

**16. I wear shoes....**

- a. Never
- b. Sometimes
- c. All the time

Mark all correct answers

**17. I wash my hands when...**

- a. When they look or feel dirty
- b. Before eating or preparing food
- c. After defecation
- d. Never

**18. When I clean my hands I....**

- a. Wipe on a cloth
- b. Use water only
- c. Use water and ash
- d. Use water and soil
- e. Use water and soap

**10. I wash my face.....**

- a. When it is dirty
- b. When there is discharge from the eyes or nose
- c. One time a day
- d. One time a week
- e. Never
